# Supplementary material for: Frailty and Co-Prescribing of Potentially Interacting Drugs in New Users of Warfarin
Source: PubMed Central journal article supplement — Drugs Aging. 2020 Mar 9;37(5):373–82. doi: 10.1007/s40266-020-00755-0 (PMC7190596; doi:10.1007/s40266-020-00755-0), 2020-03-09
Supplement: 40266_2020_755_MOESM1_ESM.pdf [file 40266_2020_755_MOESM1_ESM.pdf]

*Drugs & Aging*

## **Frailty and co-prescribing of potentially interacting drugs in new users of warfarin**

Milka Hauta-aho, Simo Teperi, Maarit J Korhonen, J Simon Bell, Nicholas Farinola, Sally Johns, Sepehr Shakib, Risto Huupponen

### **Corresponding author:**

Ms. Milka Hauta-aho, MD, MSc [ORCID 0000-0002-8210-9274]

1 Institute of Biomedicine, Research Centre for Integrative Physiology and Pharmacology, University of Turku, Turku, Finland

2 Clinical Pharmacology Unit, Turku University Hospital, Turku, Finland

3 Department of Clinical Pharmacology, Royal Adelaide Hospital, Adelaide, South Australia, Australia

Email: [milka.hauta-aho@utu.fi](mailto:milka.hauta-aho@utu.fi)

**Supplementary file 1.** List of drugs classified as 'to be avoided' and 'special consideration required' with warfarin and their ATC codes.

| <b>Drug</b>                         | <b>ATC code</b> |
|-------------------------------------|-----------------|
| Senna                               | A06AB56         |
| Mesalazine                          | A07EC02         |
| Heparin                             | B01AB01         |
| Enoxaparin                          | B01AB05         |
| Clopidogrel                         | B01AC04         |
| Acetylsalicylic acid                | B01AC06         |
| Dipyridamole                        | B01AC07         |
| Ticagrelor                          | B01AC24         |
| Amiodarone                          | C01BD01         |
| Simvastatin                         | C10AA01         |
| Rosuvastatin                        | C10AA07         |
| Gemfibrozil                         | C10AB04         |
| Fenofibrate                         | C10AB05         |
| Fish oil                            | C10AX06         |
| Betamethasone                       | D07AC01         |
| Dexamethasone                       | H02AB02         |
| Prednisolone                        | H02AB06         |
| Hydrocortisone                      | H02AB09         |
| Cortisone                           | H02AB10         |
| Thyroxine                           | H03AA01         |
| Carbimazole                         | H03BB01         |
| Dicloxacillin                       | J01CF01         |
| Sulfamethoxazole (and trimethoprim) | J01EE01         |
| Erythromycin                        | J01FA01         |
| Ciprofloxacin                       | J01MA02         |
| Moxifloxacin                        | J01MA14         |
| Metronidazole                       | J01XD01         |
| Fluconazole                         | J02AC01         |
| Mercaptopurin                       | L01BB02         |
| Azathioprine                        | L04AX01         |
| Indomethacin                        | M01AB01         |
| Diclofenac                          | M01AB05         |
| Meloxicam                           | M01AC06         |
| Ibuprofen                           | M01AE01         |
| Ibuprofen combinations              | M01AE51         |
| Celecoxib                           | M01AH01         |
| Tramadol                            | N02AX02         |
| Paracetamol                         | N02BE01         |
| Phenobarbital                       | N03AA02         |
| Phenytoin                           | N03AB02         |
| Carbamazepine                       | N03AF01         |
| Fluoxetine                          | N06AB03         |
| Citalopram                          | N06AB04         |
| Paroxetine                          | N06AB05         |
| Sertraline                          | N06AB06         |
| Escitalopram                        | N06AB10         |
| Venlafaxine                         | N06AX16         |
| Duloxetine                          | N06AX21         |
